# Supplementary material for: Species-Specific Responses of Juvenile Rockfish to Elevated pCO2: From Behavior to Genomics
Source: PLOS journal article supplement (doi:10.1371/journal.pone.0169670), 2017-01-05

**S1 Fig.** pH time series (A) from Carmel Bay, California collected using a SeaFET sensor (with a Durafet ISFET pH electrode) deployed to the benthos in the center of a large kelp bed at 12 m depth (B). pH readings were made every 15 minutes and are plotted as hourly means. The gap from May to October 2013 occurred due to a flooded housing.

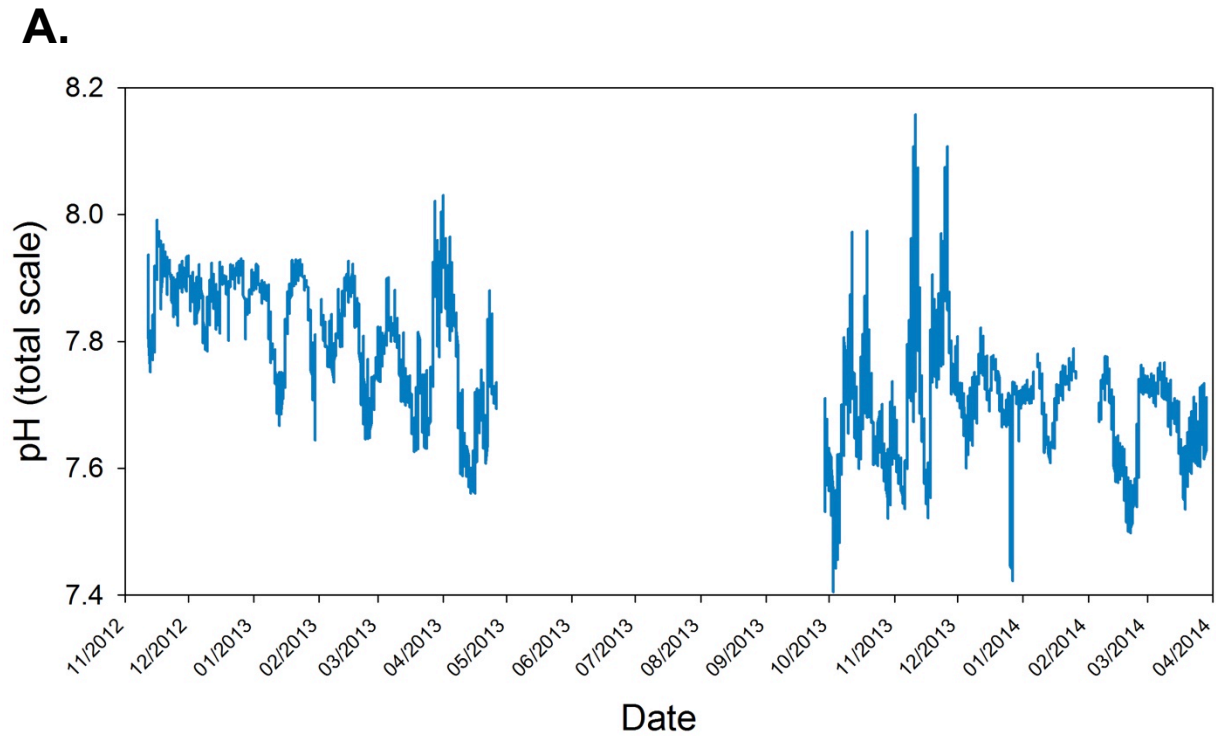

**B.**

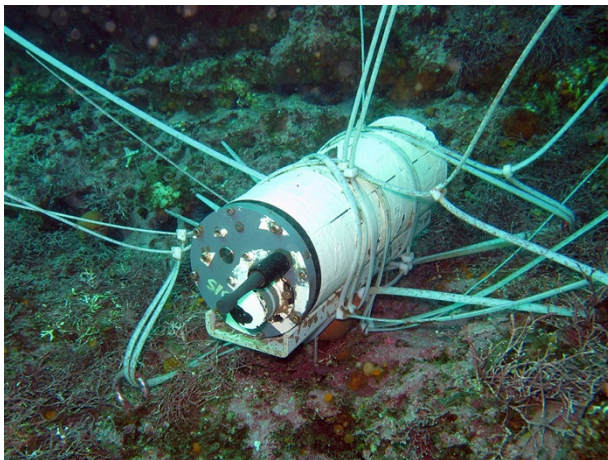

Supplement: S5 (10.1371/journal.pone.0169670.s005) [file journal.pone.0169670.s005]
