# Supplementary material for: Species-Specific Responses of Juvenile Rockfish to Elevated pCO2: From Behavior to Genomics
Source: PLOS journal article supplement (doi:10.1371/journal.pone.0169670), 2017-01-05

**S2 Fig.** Absolute lateralization index (higher values are more lateralized) for copper and blue rockfish as a function of  $p\text{CO}_2$  treatment history. Bars are mean values ( $\pm$  SE). Letters over bars represent results of Tukey HSD post-hoc tests; significantly different means do not share letters in common.

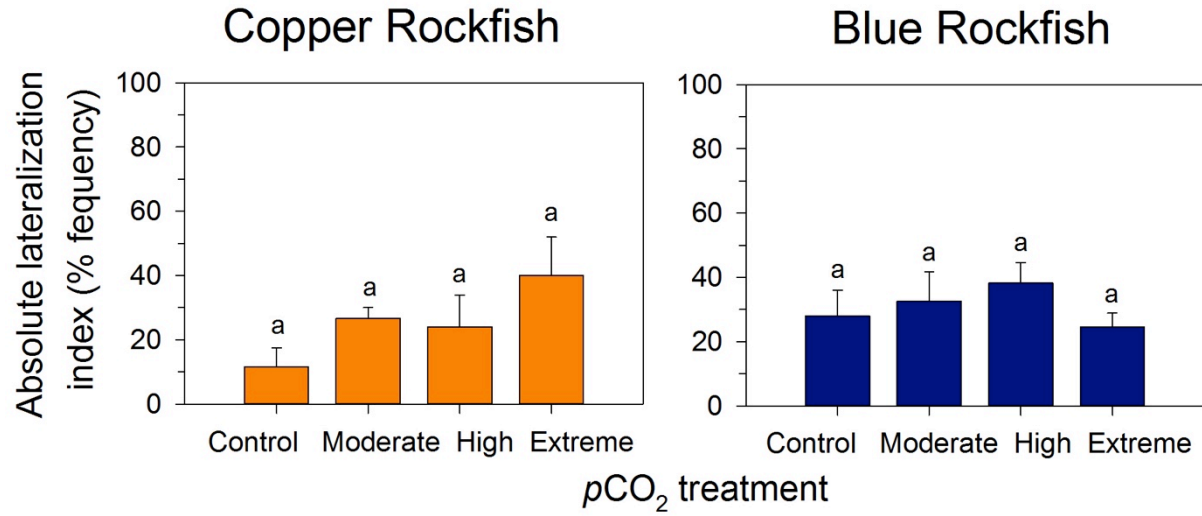

Supplement: S6 (10.1371/journal.pone.0169670.s006) [file journal.pone.0169670.s006]
