# Supplementary material for: Species-Specific Responses of Juvenile Rockfish to Elevated pCO2: From Behavior to Genomics
Source: PLOS journal article supplement (doi:10.1371/journal.pone.0169670), 2017-01-05

**S3 Fig.** Growth rates ( $\text{mm d}^{-1}$ ) measured as a change in length over the experimental exposure duration for copper and blue rockfish as a function of  $p\text{CO}_2$  treatment history. Bars are mean values ( $\pm$  SE). Letters over bars represent results of Tukey HSD post-hoc tests; significantly different means do not share letters in common.

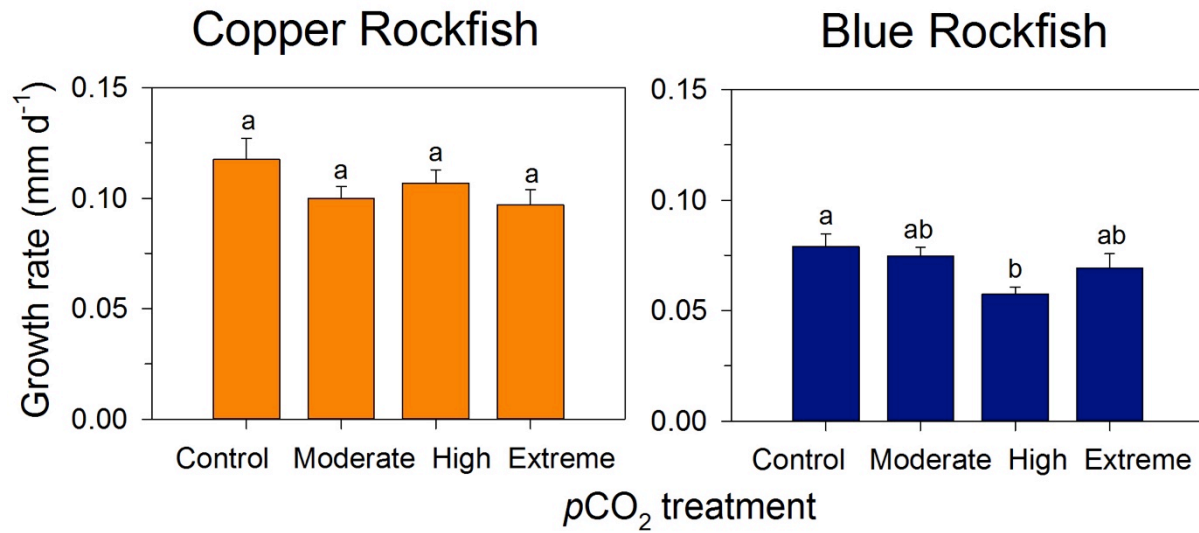

Supplement: S7 (10.1371/journal.pone.0169670.s007) [file journal.pone.0169670.s007]
